# Supplementary material for: Effective catalysis of imine metathesis by means of fast transiminations between aromatic–aromatic or aromatic–aliphatic amines
Source: Royal Society of Chemistry journal article supplement (doi:10.1039/c4ob00107a), 2014-01-01
Supplement: c4ob00107a1.pdf [file c4ob00107a1.pdf]

## Electronic Supplementary Information

for

# Effective Catalysis of Imine Metathesis by means of Fast Transiminations between Aromatic-Aromatic or Aromatic-Aliphatic Amines

Maria Ciaccia, Silvia Pilati, Roberta Cacciapaglia, Luigi Mandolini and  
Stefano Di Stefano\*

### Table of contents

|                                                                                 |       |
|---------------------------------------------------------------------------------|-------|
| Kinetic equation for reversible reactions, second order in both directions      | SI 2  |
| Aromatic-aromatic and aromatic-aliphatic imine metathesis (typical experiments) | SI 3  |
| Kinetic measurements (data reported in the main text, Table 1)                  | SI 5  |
| Kinetic measurements (data reported in the main text, Table 2)                  | SI 12 |

*Dipartimento di Chimica, Sapienza Università di Roma and Istituto CNR di Metodologie Chimiche (IMC-CNR), Sezione Meccanismi di Reazione, c/o Dipartimento di Chimica, Sapienza Università di Roma, P.le A. Moro, 5 I-00185 Roma, Italy*

### Kinetic equation for reversible reactions, second order in both directions

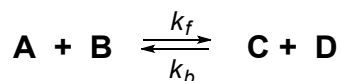

From ref S1, the standard kinetic equation is given in eqn (S1).

$$[Pdt] = \frac{\{b \cdot [1 - g \cdot \exp(p \cdot t)] + r \cdot [1 + g \cdot \exp(p \cdot t)]\}}{2a \cdot [1 - g \cdot \exp(p \cdot t)]} \quad (\text{S1})$$

where

$$p = \frac{k_f \cdot r}{[C]_e \cdot [D]_e}$$

$$g = \frac{b - r}{b + r}$$

$$r = \sqrt{b^2 - 4a \cdot c}$$

$$a = [C]_e \cdot [D]_e - [A]_e \cdot [B]_e$$

$$b = - \left\{ \left( [A]_0 + [B]_0 \right) \cdot [C]_e \cdot [D]_e + \left( [C]_0 + [D]_0 \right) \cdot [A]_e \cdot [B]_e \right\}$$

$$c = [A]_0 \cdot [B]_0 \cdot [C]_e \cdot [D]_e - [A]_e \cdot [B]_e \cdot [C]_0 \cdot [D]_0$$

In our experiments  $[A]_0 = [B]_0$  and  $[C]_0 = [D]_0 = 0$  in all cases.

The equilibrium constant  $K = k_f / k_b$  is defined in terms of equilibrium concentration of reactants and products.

$$K = \frac{[C]_e \cdot [D]_e}{[A]_e \cdot [B]_e}$$

---

<sup>S1</sup> N. E., Meagher, D. B. Rorabacher *J. Phys. Chem.* **1994**, 98, 12590-12593.

### Aromatic-aromatic and aromatic-aliphatic imine metathesis (typical experiments)

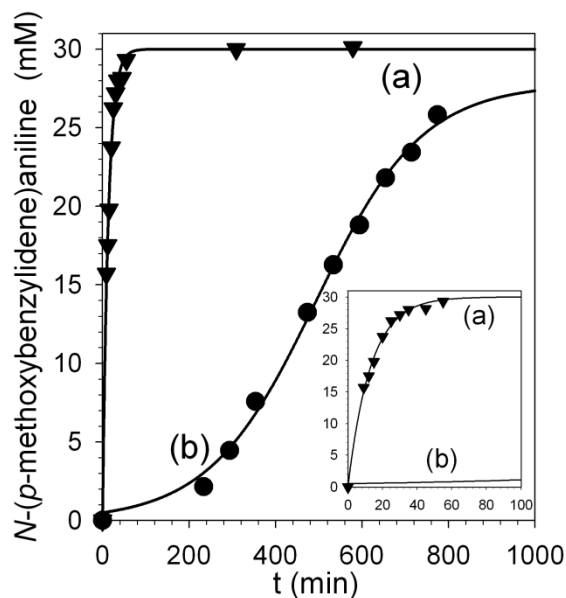

**Figure S1.** Reaction progress as a function of time for 18 mM amine-catalyzed (a) and background (b) metathesis between 60 mM *N*-(*p*-methoxybenzylidene)*p*-toluidine and 60 mM *N*-benzylideneaniline in  $\text{CDCl}_3$  at 25 °C. Curve (a) is a plot of a first-order equation, curve (b) is a guide to the eye.

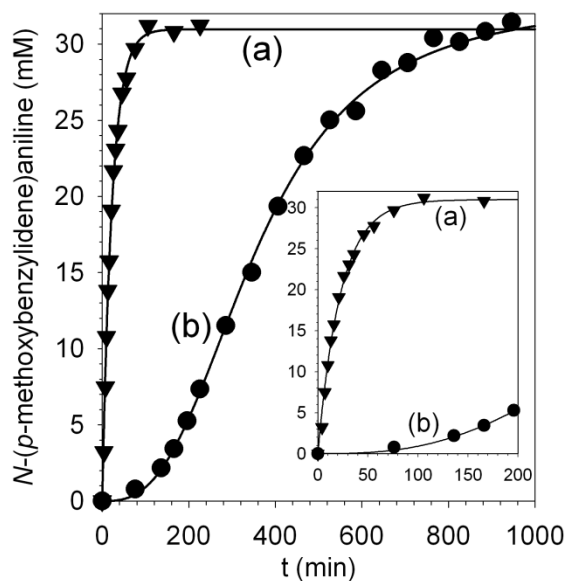

**Figure S2.** Reaction progress as a function of time for 18 mM amine-catalyzed (a) and background (b) metathesis between 60 mM *N*-(*p*-methoxybenzylidene)*p*-toluidine and 60 mM *N*-benzylideneaniline in  $\text{CD}_3\text{OD}$  at 25 °C. Curve (a) is a plot of a first-order equation, curve (b) is a guide to the eye.

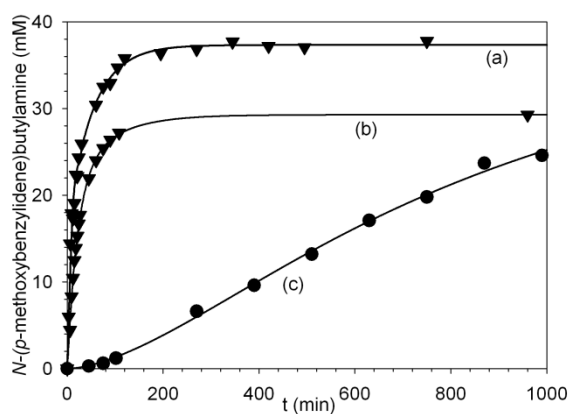

**Figure S3.** Reaction progress as a function of time for 18 mM butylamine catalyzed (a), 18 mM toluidine catalyzed (b), and background (c) metathesis between 60 mM *N*-(*p*-methoxybenzylidene)*p*-toluidine and *N*-benzylidenebutylamine in  $\text{CDCl}_3$  at 25 °C. The curves are guides to the eye.

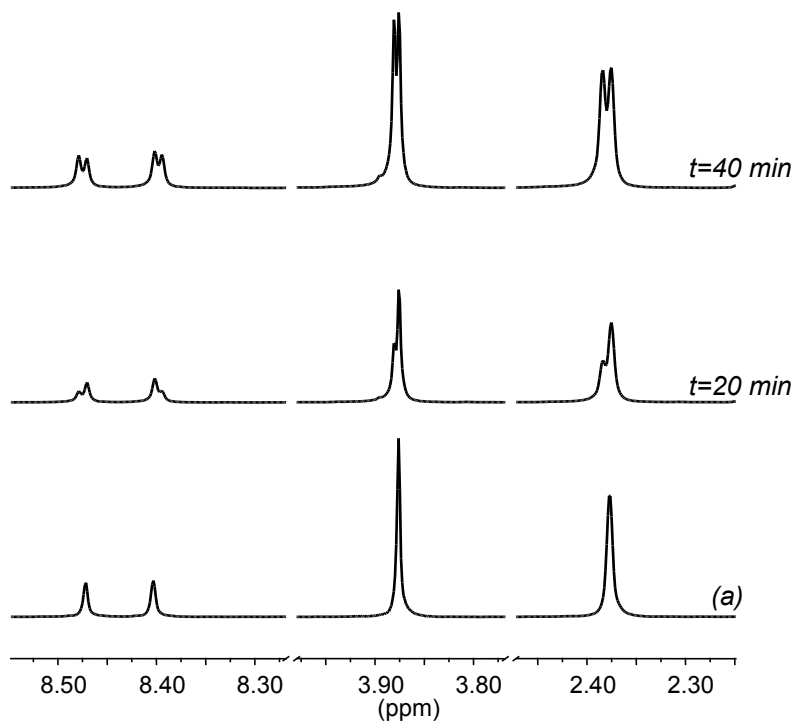

**Figure S4.** Metathesis between 60 mM *N*-(*p*-methoxybenzylidene)*p*-toluidine and 60 mM *N*-benzylideneaniline in  $\text{CDCl}_3$  at 25 °C. Monitoring of imine ( $\delta = 8.35 - 8.40 \text{ ppm}$ ),  $-\text{OCH}_3$  ( $\delta = 3.85 - 3.90 \text{ ppm}$ ), or  $-\text{CH}_3$  ( $\delta = 2.35 - 2.40 \text{ ppm}$ ) signals gave coincident results, within experimental errors.

### Kinetic measurements (data reported in the main text, Table 1)

|                                                                                                                          |       |
|--------------------------------------------------------------------------------------------------------------------------|-------|
| - Transimination between <i>N</i> -benzylideneaniline and <i>p</i> -toluidine in CDCl <sub>3</sub>                       | SI 6  |
| - Transimination between <i>N</i> -benzylideneaniline and <i>p</i> -toluidine in CD <sub>2</sub> Cl <sub>2</sub>         | SI 7  |
| - Transimination between <i>N</i> -benzylideneaniline and <i>p</i> -toluidine in CD <sub>3</sub> CN                      | SI 8  |
| - Transimination between <i>N</i> -( <i>p</i> -methoxybenzylidene)- <i>p</i> -toluidine and aniline in CDCl <sub>3</sub> | SI 9  |
| - Transimination between <i>N</i> -( <i>p</i> -cyanobenzylidene)- <i>p</i> -toluidine and aniline in CDCl <sub>3</sub>   | SI 10 |
| - Transimination between <i>N</i> -( <i>p</i> -nitrobenzylidene)- <i>p</i> -toluidine and aniline in CDCl <sub>3</sub>   | SI 11 |

### Notes

*i*) One typical kinetic run has been here reported for each entry of Table 1 (main text). Average data of two to three independent runs have been given, on the other hand, in Table 1 (see footnote *c* to the same table in the main text).

*ii*) Data of the transimination between *N*-(*p*-X-benzylidene)anilines and *p*-toluidine (eqn (1), X = OCH<sub>3</sub>, CN, NO<sub>2</sub>, and Table 1 of the main text, entries 4-6) have been obtained by monitoring of the equilibration process starting from products of eqn (1), *i. e.* from *N*-(*p*-X-benzylidene)toluidines and aniline.

*iii*) Monitoring of imine or methyl signals gave coincident results, within experimental errors. A deconvolution procedure was adopted for integration of imine signals.

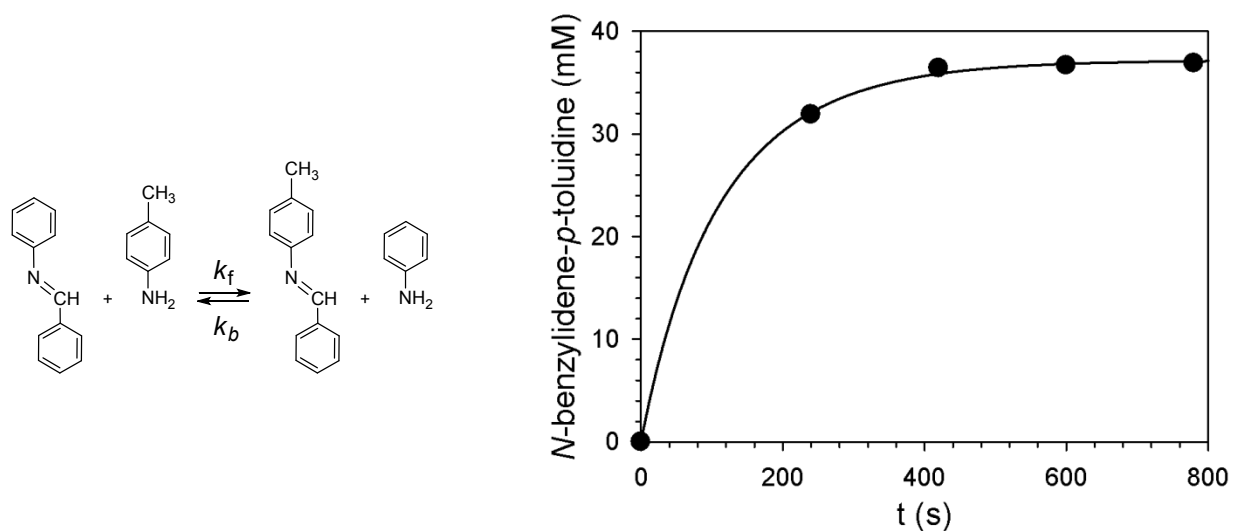

**Figure S5.**  $^1\text{H}$  NMR monitoring of the transimination between 60 mM *N*-benzylideneaniline and 60 mM *p*-toluidine in  $\text{CDCl}_3$ , 25  $^\circ\text{C}$ .

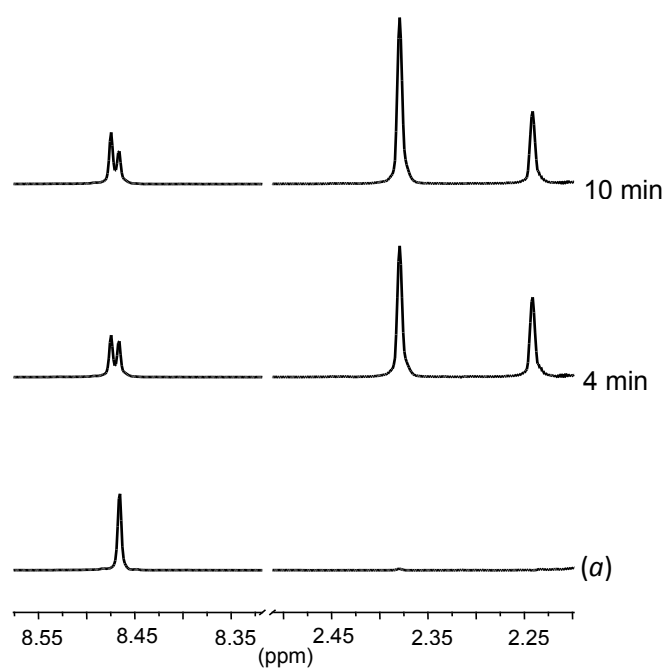

**Figure S6.** Transimination between 60 mM *N*-benzylideneaniline and 60 mM *p*-toluidine in  $\text{CDCl}_3$ , 25  $^\circ\text{C}$ . Imine (left) and methyl region (right) of the  $^1\text{H}$ -NMR spectra before addition of *p*-toluidine (a), and at the given reaction times.

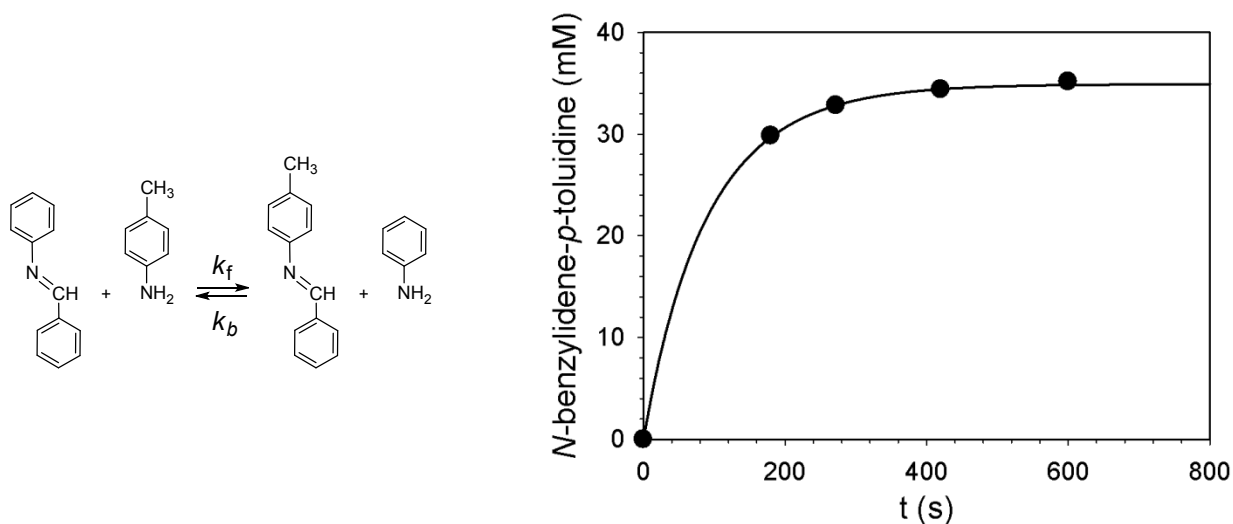

**Figure S7.**  $^1\text{H}$  NMR monitoring of the transimination between 60 mM *N*-benzylideneaniline and 60 mM *p*-toluidine in  $\text{CD}_2\text{Cl}_2$ , 25 °C.

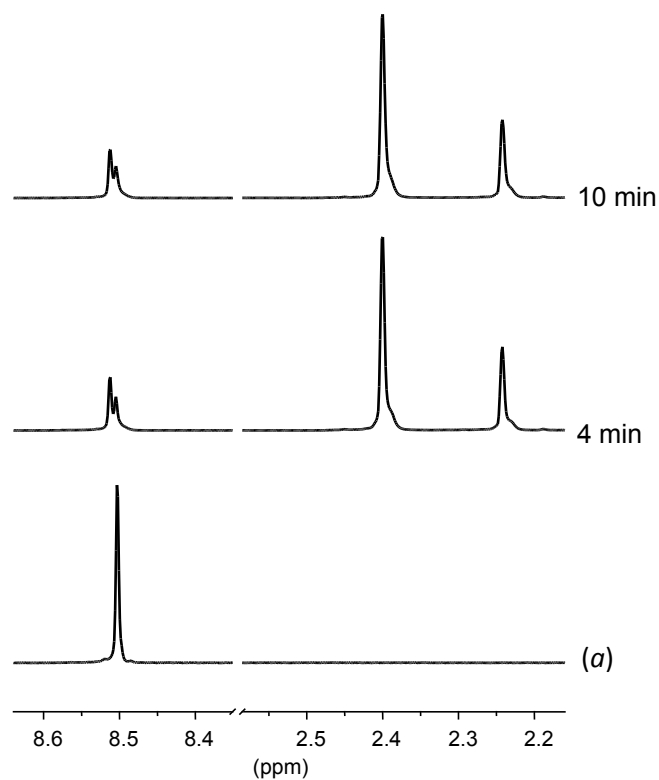

**Figure S8.** Transimination between 60 mM *N*-benzylideneaniline and 60 mM *p*-toluidine in  $\text{CD}_2\text{Cl}_2$ , 25 °C. Imine (left) and methyl region (right) of the  $^1\text{H}$ -NMR spectra before addition of *p*-toluidine (a), and at the given reaction times.

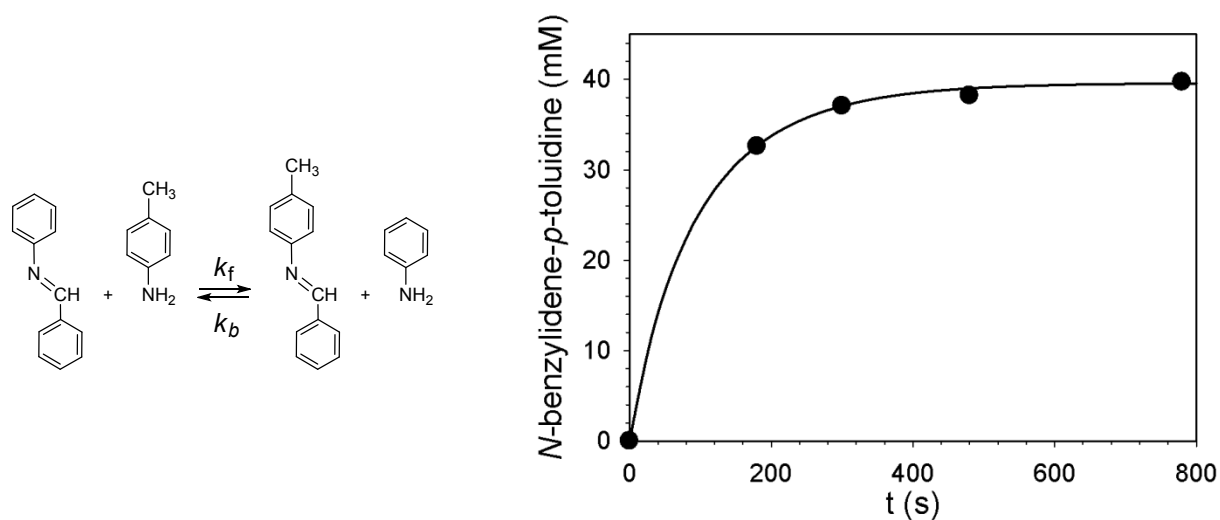

**Figure S9.**  $^1\text{H}$  NMR monitoring of the transimination between 60 mM *N*-benzylideneaniline and 60 mM *p*-toluidine in  $\text{CD}_3\text{CN}$ , 25 °C.

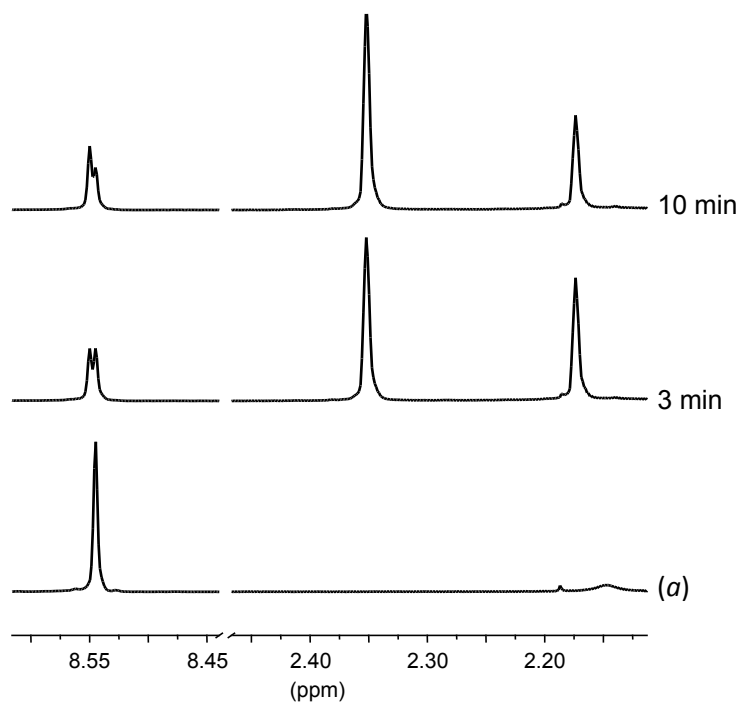

**Figure S10.** Transimination between 60 mM *N*-benzylideneaniline and 60 mM *p*-toluidine in  $\text{CD}_3\text{CN}$ , 25 °C. Imine (left) and methyl region (right) of the  $^1\text{H}$ -NMR spectra before addition of *p*-toluidine (*a*), and at the given reaction times.



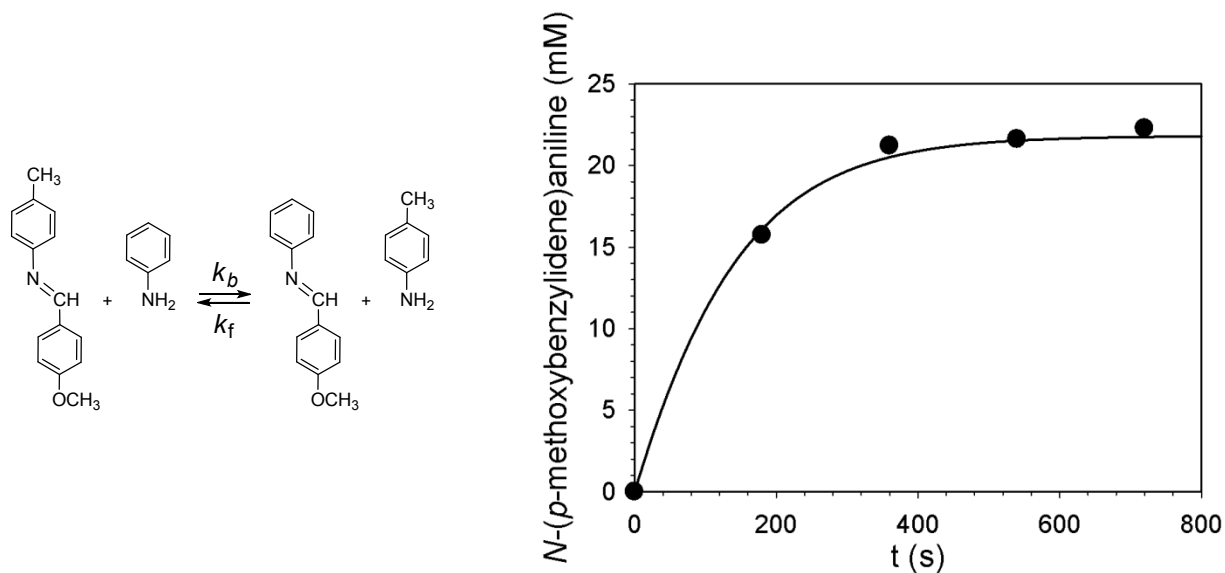

**Figure S11.**  $^1\text{H}$  NMR monitoring of the transimination between 60 mM *N*-(*p*-methoxybenzylidene)-*p*-toluidine and 60 mM aniline in  $\text{CDCl}_3$ , 25 °C.

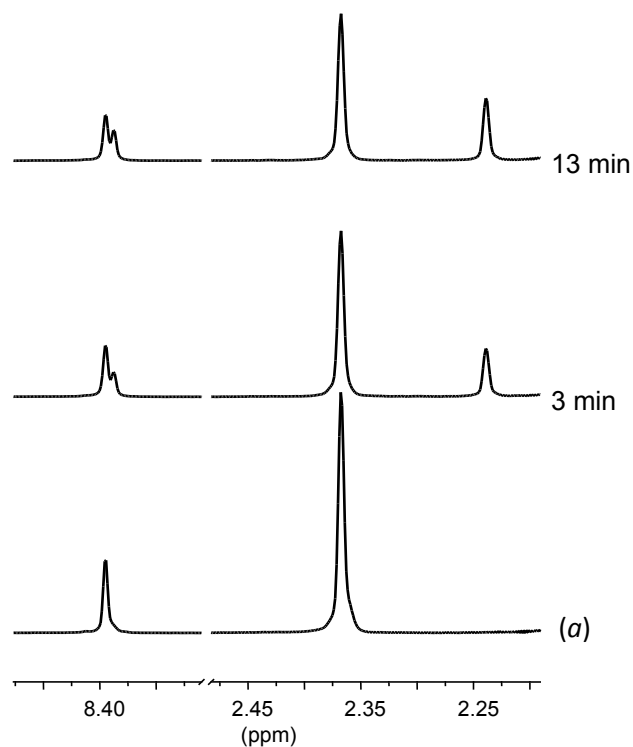

**Figure S12.** Transimination between 60 mM *N*-(*p*-methoxybenzylidene)-*p*-toluidine and 60 mM aniline in  $\text{CDCl}_3$ , 25 °C. Imine (left) and methyl region (right) of the  $^1\text{H}$ -NMR spectra before addition of aniline (a), and at the given reaction times.

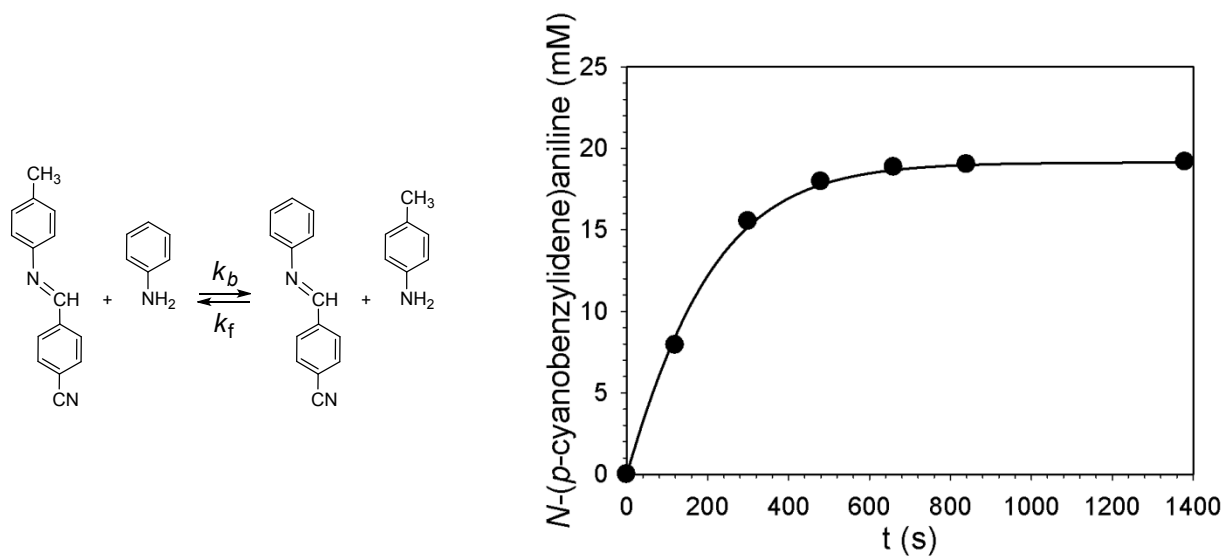

**Figure S13.**  $^1\text{H}$  NMR monitoring of the transimination between 60 mM *N*-(*p*-cyanobenzylidene)-*p*-toluidine and 60 mM aniline in  $\text{CDCl}_3$ , 25 °C.

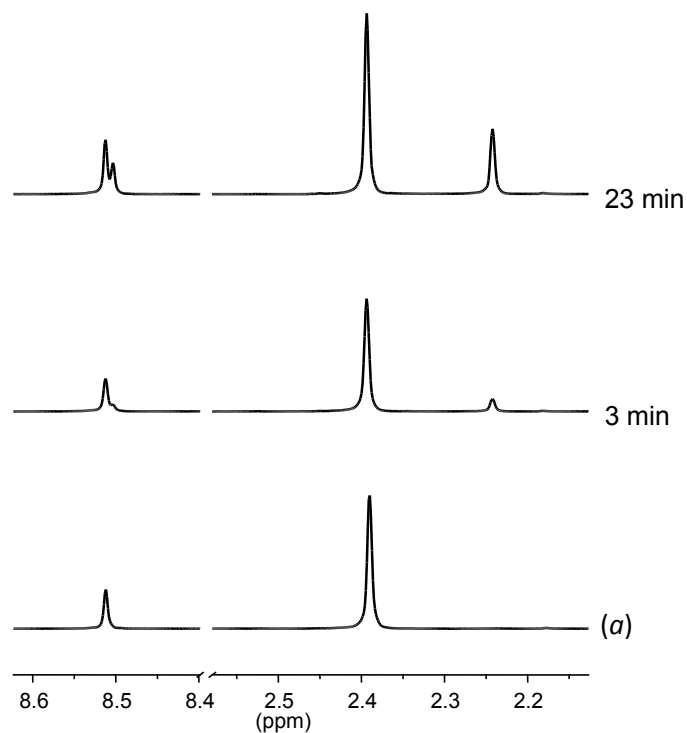

**Figure S14.** Transimination between 60 mM *N*-(*p*-cyanobenzylidene)-*p*-toluidine and 60 mM aniline in  $\text{CDCl}_3$ , 25 °C. Imine (left) and methyl region (right) of the  $^1\text{H}$ -NMR spectra before addition of aniline (a), and at the given reaction times.

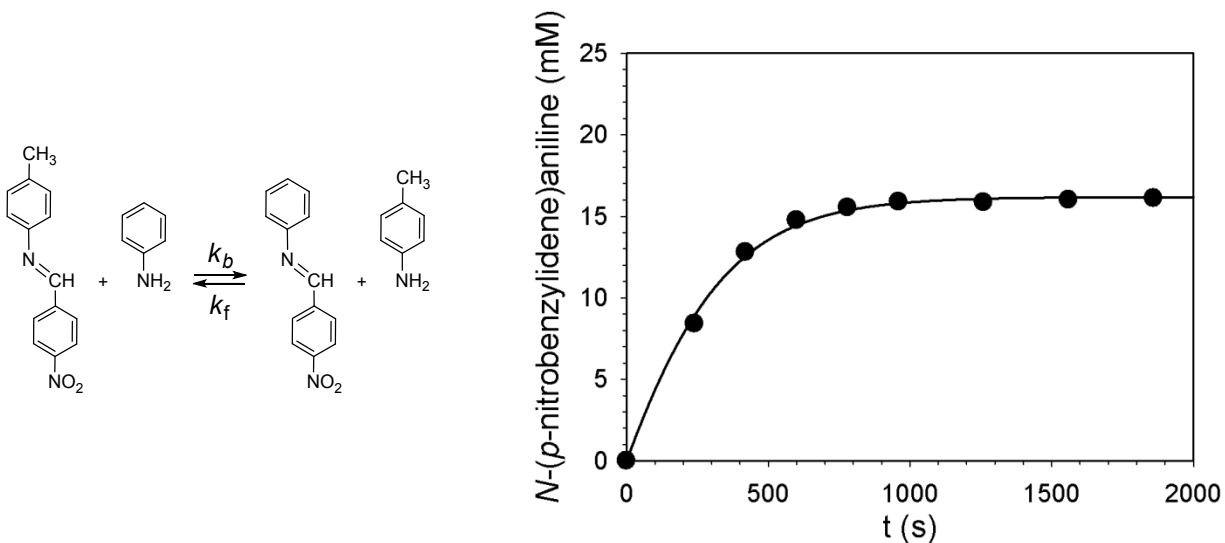

**Figure S15.**  $^1\text{H}$  NMR monitoring of the transimination between 60 mM *N*-(*p*-nitrobenzylidene)-*p*-toluidine and 60 mM aniline in  $\text{CDCl}_3$ , 25 °C.

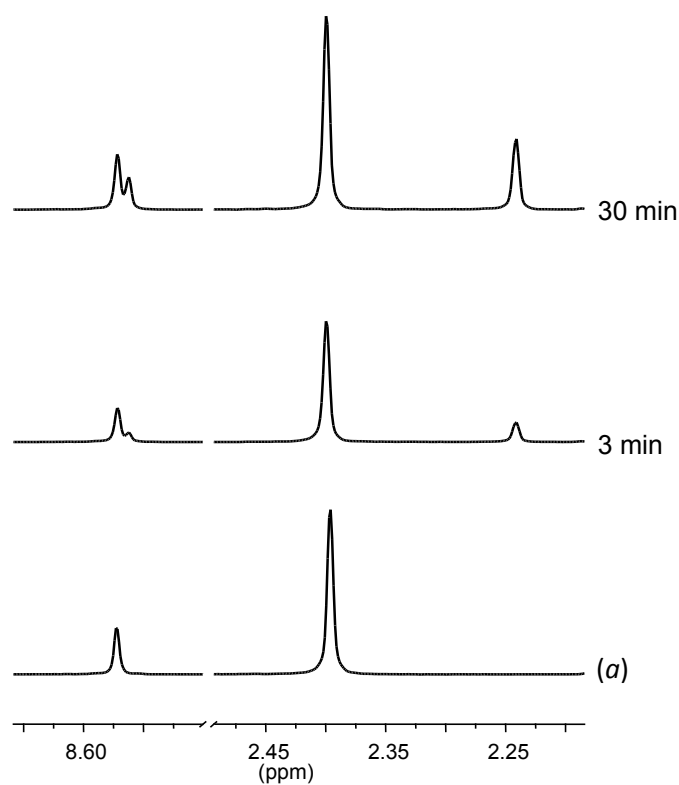

**Figure S16.** Transimination between 60 mM *N*-(*p*-nitrobenzylidene)-*p*-toluidine and 60 mM aniline in  $\text{CDCl}_3$ , 25 °C. Imine (left) and methyl region (right) of the  $^1\text{H}$ -NMR spectra before addition of aniline (a), and at the given reaction times.

### Kinetic measurements (data reported in the main text, Table 2)

|                                                                                                                             |       |
|-----------------------------------------------------------------------------------------------------------------------------|-------|
| - Transimination between <i>N</i> -benzylidenebutylamine and <i>p</i> -toluidine in CDCl <sub>3</sub>                       | SI 13 |
| - Transimination between <i>N</i> -( <i>p</i> -methoxybenzylidene)- <i>p</i> -toluidine and butylamine in CDCl <sub>3</sub> | SI 14 |
| - Transimination between <i>N</i> -( <i>p</i> -cyanobenzylidene)- <i>p</i> -toluidine and butylamine in CDCl <sub>3</sub>   | SI 15 |
| - Transimination between <i>N</i> -( <i>p</i> -nitrobenzylidene)- <i>p</i> -toluidine and butylamine in CDCl <sub>3</sub>   | SI 16 |

### Notes

*i*) One typical kinetic run has been here reported for each entry of Table 2 (main text). Average data of two to three independent runs have been given, on the other hand, in Table 2 (see footnote *c* to the same table in the main text).

*ii*) Data of the transimination between *N*-benzylidene-*p*-toluidine and butylamine (eqn (4), X = H and Table 2 of the main text, entry 1) have been obtained by monitoring of the equilibration process starting from products of eqn (4), *i. e.* from *N*-benzylidenebutylamine and *p*-toluidine.

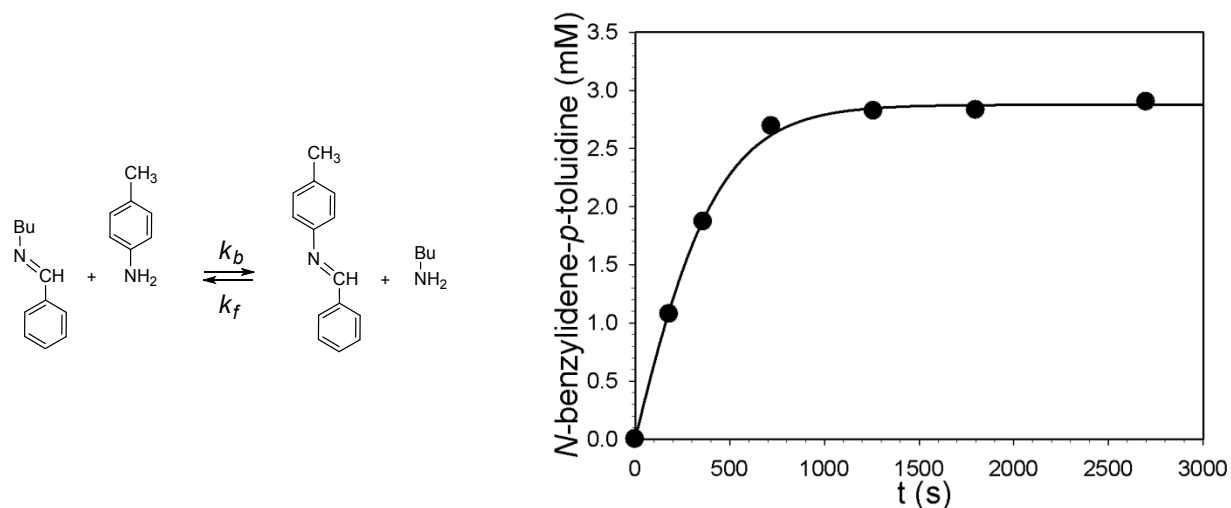

**Figure S17.**  $^1\text{H}$  NMR monitoring of the transimination between 20 mM *N*-benzylidenebutylamine and 20 mM *p*-toluidine in  $\text{CDCl}_3$ , 25  $^\circ\text{C}$ .

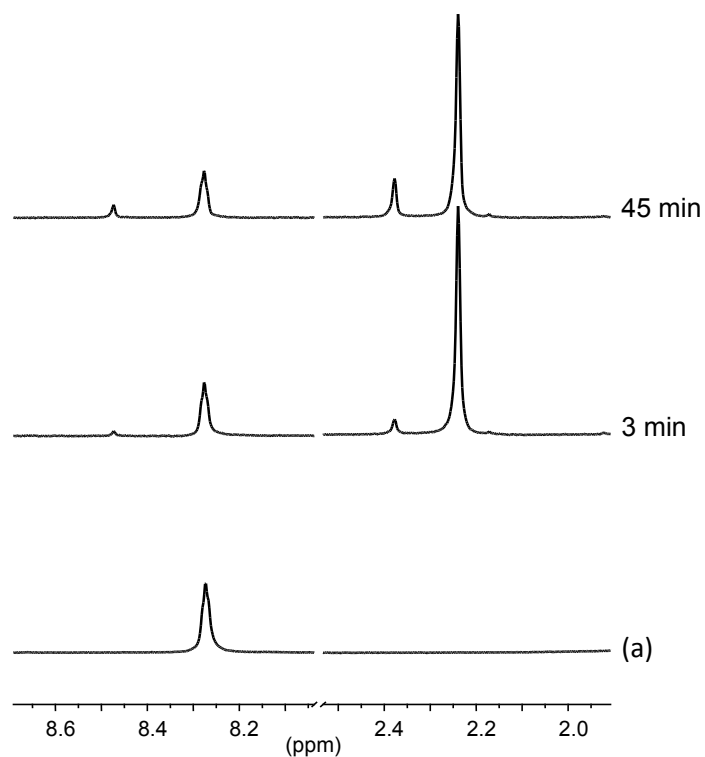

**Figure S18.** Transimination between 20 mM *N*-benzylidenebutylamine and 20 mM *p*-toluidine in  $\text{CDCl}_3$ , 25  $^\circ\text{C}$ . Imine (left) and methyl region (right) of the  $^1\text{H}$ -NMR spectra before addition of *p*-toluidine (a), and at the given reaction times.

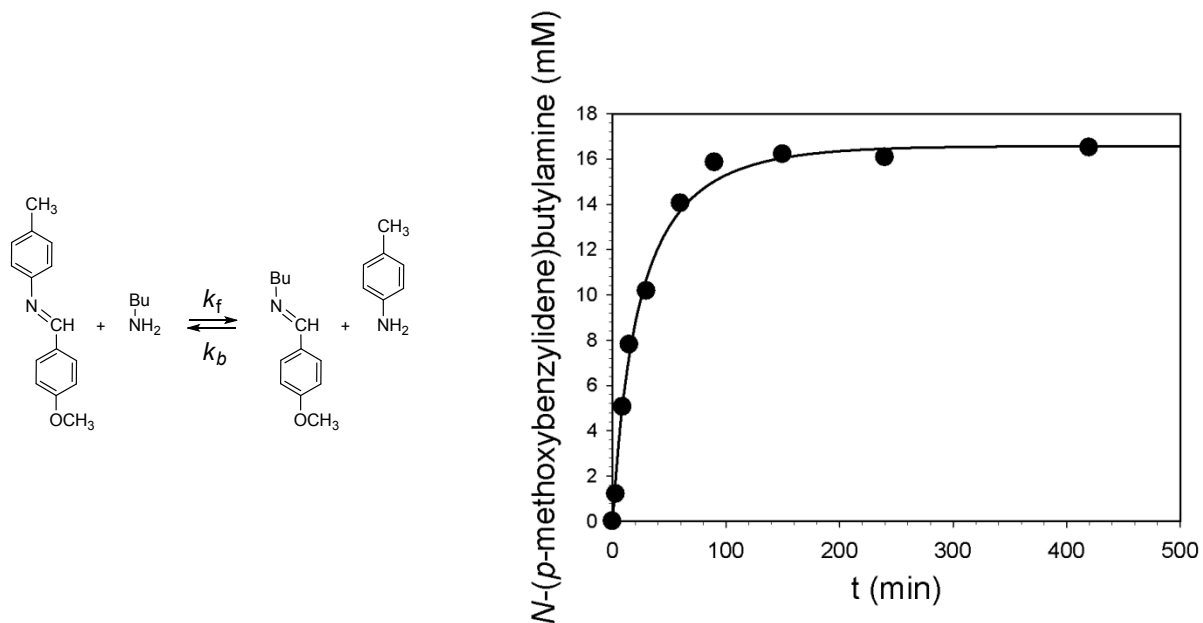

**Figure S19.** <sup>1</sup>H NMR monitoring of the transimination between 20 mM *N*-(*p*-methoxybenzylidene)-*p*-toluidine and 20 mM butylamine in CDCl<sub>3</sub>, 25 °C.

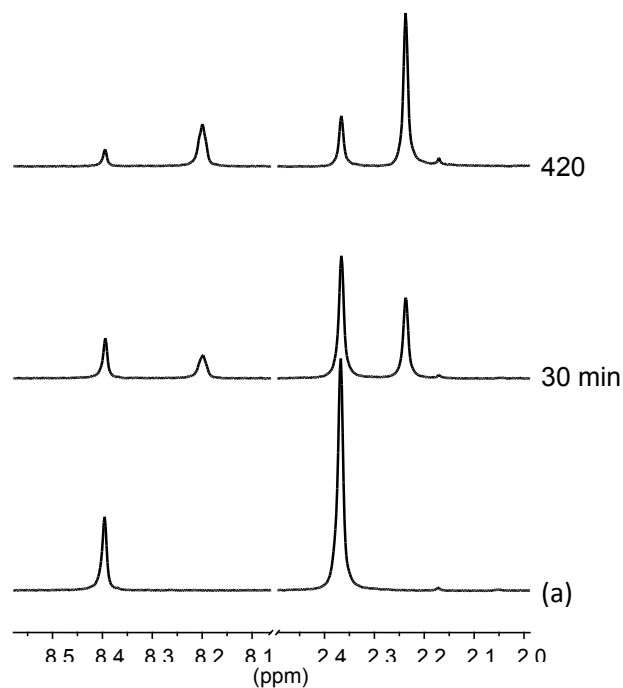

**Figure S20.** Transimination between 20 mM *N*-(*p*-methoxybenzylidene)-*p*-toluidine and 20 mM butylamine in CDCl<sub>3</sub>, 25 °C. Imine (left) and methyl region (right) of the <sup>1</sup>H-NMR spectra before addition of butylamine (a), and at the given reaction times.

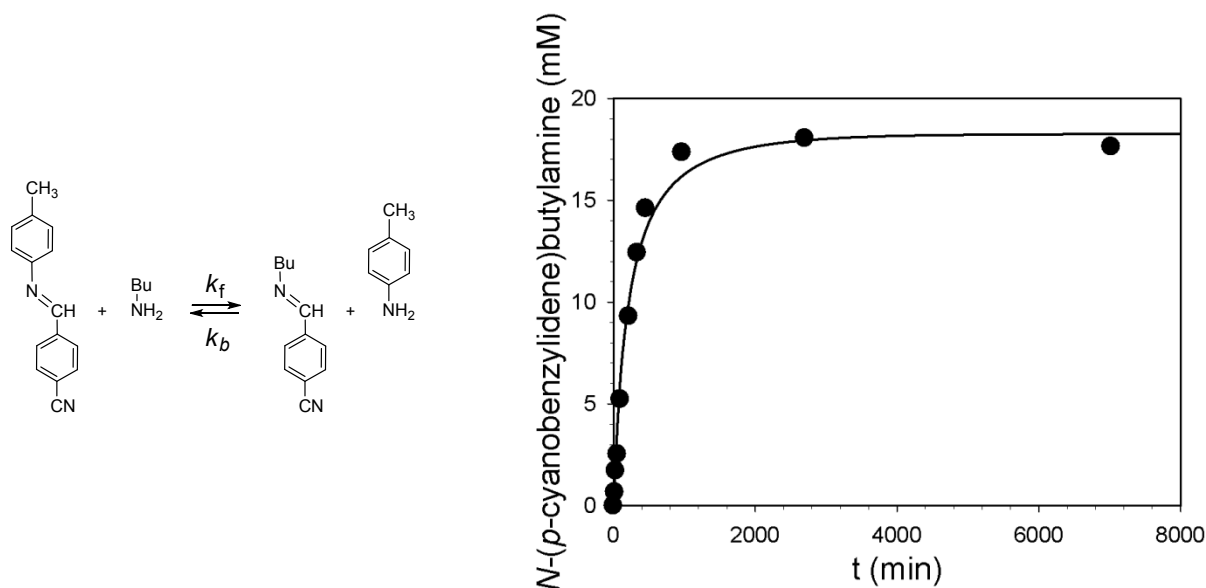

**Figure S21.** <sup>1</sup>H NMR monitoring of the transimination between 20 mM *N*-(*p*-cyanobenzylidene)-*p*-toluidine and 20 mM butylamine in CDCl<sub>3</sub>, 25 °C.

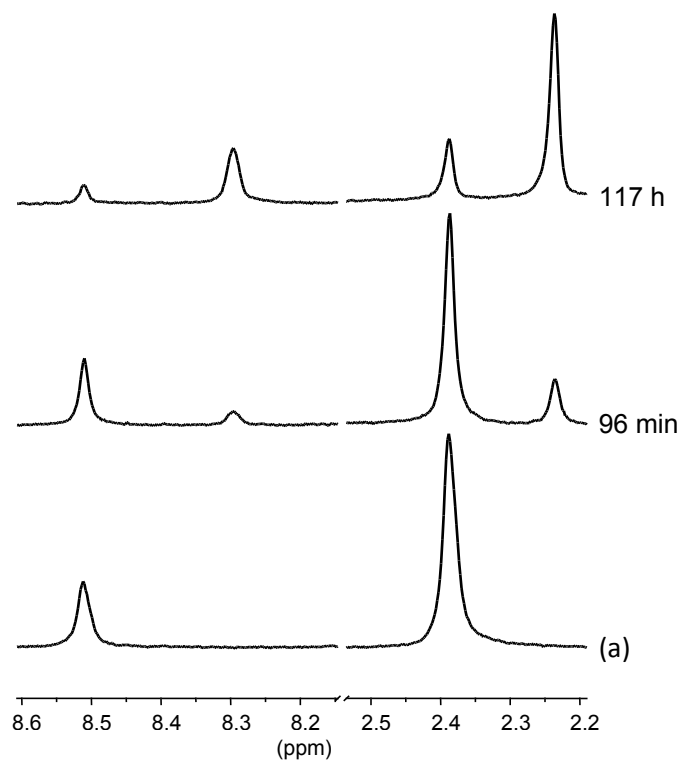

**Figure S22.** Transimination between 20 mM *N*-(*p*-cyanobenzylidene)-*p*-toluidine and 20 mM butylamine in CDCl<sub>3</sub>, 25 °C. Imine (left) and methyl region (right) of the <sup>1</sup>H-NMR spectra before addition of aniline (a), and at the given reaction times.

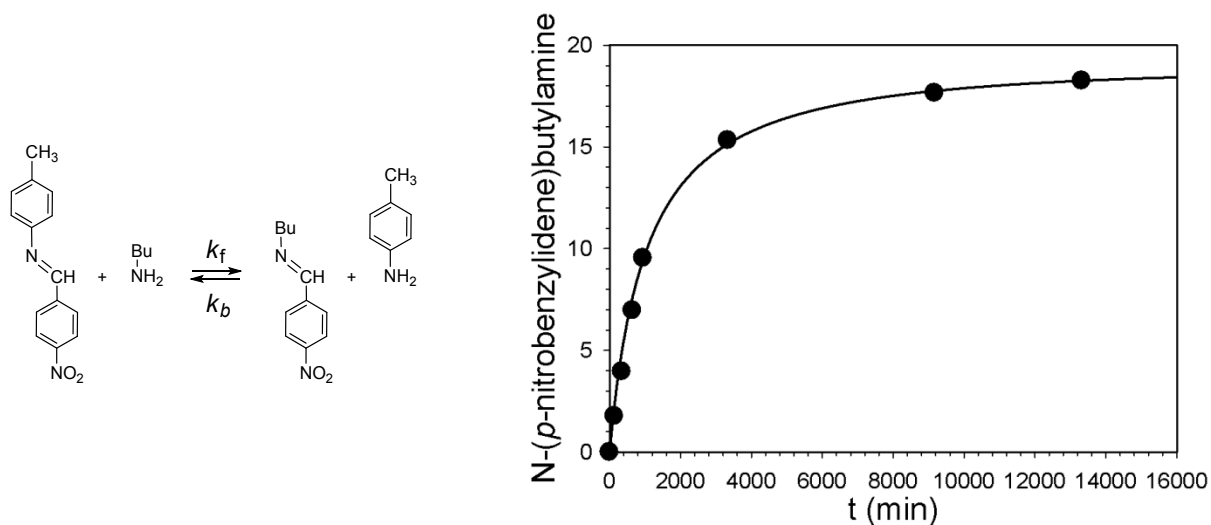

**Figure S23.** <sup>1</sup>H NMR monitoring of the transamination between 20 mM *N*-(*p*-nitrobenzylidene)-*p*-toluidine and 20 mM butylamine in CDCl<sub>3</sub>, 25 °C.

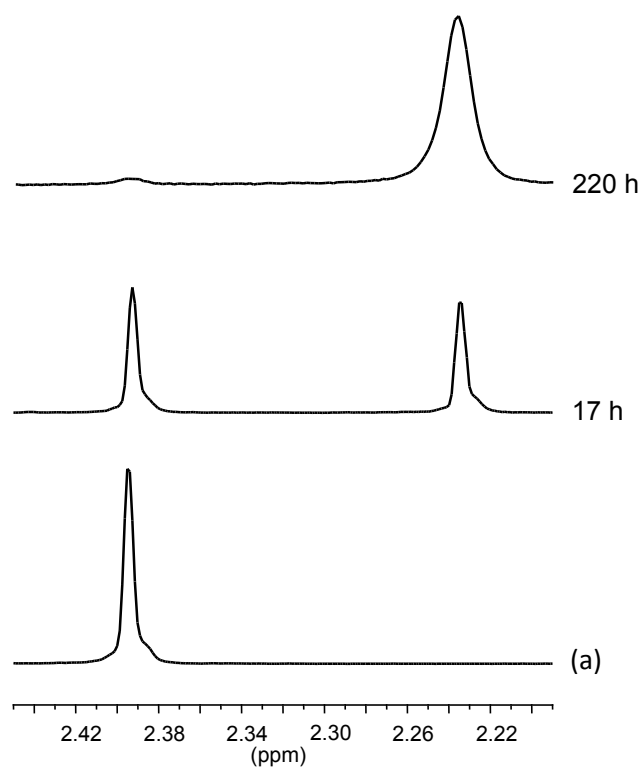

**Figure S24.** Transamination between 20 mM *N*-(*p*-nitrobenzylidene)-*p*-toluidine and 20 mM butylamine in CDCl<sub>3</sub>, 25 °C. Methyl region of the <sup>1</sup>H-NMR spectra before addition of butylamine (*a*), and at the given reaction times.
